## Prognostic implications of myocardial work in patients with reduced left ventricular ejection fraction: a preliminary study

S. Strada<sup>1</sup>, G. Casas Masnou<sup>2</sup>, V. Gonzalez Fernandez<sup>2</sup>, J. Lozano Torres<sup>2</sup>, L. La Mura<sup>3</sup>, A. Cinque<sup>4</sup>, M. Pisaniello<sup>5</sup>, F. Valente<sup>2</sup>, R. Fernandez Galera<sup>2</sup>, L. Gutierrez Garcia Moreno<sup>2</sup>, L. Galian Gay<sup>2</sup>, G. Teixido Tura<sup>2</sup>, M.T. Gonzalez Alujas<sup>2</sup>, I. Ferreira Gonzalez<sup>2</sup>, J.F. Rodriguez Palomares<sup>2</sup>

<sup>1</sup>IRCCS San Raffaele Hospital, Milan, Italy; <sup>2</sup>University Hospital Vall d'Hebron, Barcelona, Spain; <sup>3</sup>Federico II University Hospital, Department of Advanced Biomedical Sciences, Naples, Italy; <sup>4</sup>Sapienza University of Rome, Rome, Italy; <sup>5</sup>University of Milan, Milan, Italy

**Funding Acknowledgement:** Type of funding source: Public hospital(s). Main funding source(s): University Hospital Vall d'Hebron

**Background:** Myocardial work (MW) is a new imaging technique to assess left ventricular (LV) systolic function. It incorporates both deformation parameters (global longitudinal strain -GLS-) and loading conditions and gives information on global constructive work (GCW), global wasted work (GWW), global LV myocardial work index (GWI) and global LV myocardial work efficiency (GWE).

**Purpose:** The aim of this study was to describe the prognostic role of MW in predicting major adverse cardiovascular events (MACE) in patients with reduced LV ejection fraction (LVEF), and to compare it with GLS and LVEF.

**Methods:** We retrospectively included consecutive patients from 2012 to 2019 with dilated LV and LVEF <50% of any aetiology. Clinical variables were collected and LVEF, GLS and MW were evaluated from baseline echocardiogram. MACE was defined as heart failure (HF) and/or ventricular arrhythmia (VA) and/or cardiac arrest and/or all cause death.

**Results:** 99 patients were included, 26 were women (26.3%), mean age at diagnosis was 57 years (SD 23). Mean LVEF was 32.5% (SD 10.3).

Baseline patients characteristics are described in Table 1. During a median follow-up of 25 months (IQR 12), 24 MACE were recorded (24.4%). Patients with MACE had worse MW parameters: significantly lower MWI ( $805 \pm 360\%$  vs  $638 \pm 277\%$ ,  $p=0.04$ ) and lower GCW ( $1116 \pm 535$  mmHg vs  $874 \pm 458$  mmHg,  $p=0.05$ ), and a tendency to lower GWE ( $83 \pm 11\%$  vs  $77 \pm 16\%$ ,  $p=0.084$ ). Of note, both LVEF ( $33 \pm 10\%$  vs  $29 \pm 9\%$ ,  $p=0.123$ ) and GLS ( $-9.99 \pm 3.7\%$  vs  $-8.8 \pm 3.0$ ,  $p=0.170$ ) showed a trend but were not significantly associated with outcomes. This might suggest that MW variables are stronger prognostic predictors than traditional imaging parameters.

**Conclusions:** In patients with reduced LVEF, MW parameters including global MWI and GCW were associated with major adverse cardiovascular events. Of note, both EF and GLS seem to have less prognostic implications in this cohort when compared with MW. Our results are preliminary and larger studies are needed in order to fully understand the clinical utility of MW beyond traditional parameters.

Baseline patients characteristics

|                               | Global      | Events     | No. events  | p     |
|-------------------------------|-------------|------------|-------------|-------|
| Hypertension (%)              | 41          | 67         | 29          | 0.014 |
| Creatinine, mean (SD) – mg/dL | 0.96 (0.04) | 1.1 (0.09) | 0.90 (0.04) | 0.021 |
| Bblockers (%)                 | 98          | 100        | 97          | 0.514 |
| Nitrates (%)                  | 4           | 13         | 0           | 0.025 |
| Diuretics (%)                 | 65          | 93         | 53          | 0.006 |

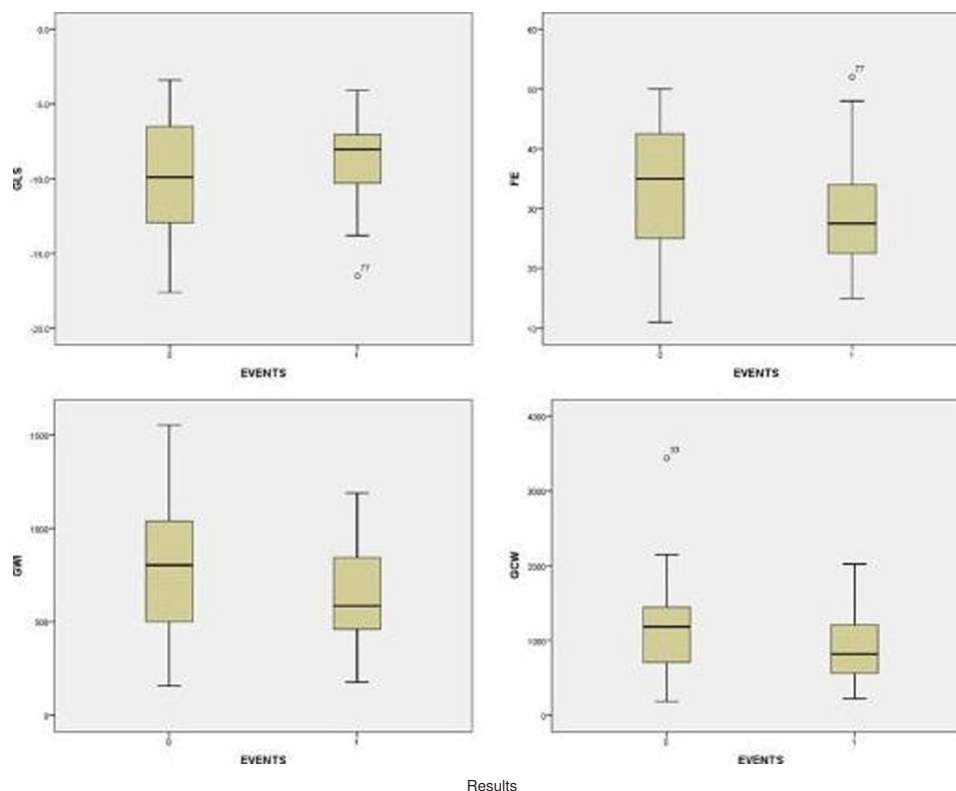

Source: http://academic.oup.com/eurheartj/article-pdf/41/Supplement_2/ehaa946.0928/34516791/ehaa946.0928.pdf
